# Supplementary material
Source: PubMed Central journal article supplement (PMC5776680)
Supplement: NIHMS933568-supplement-supplemental.pdf [file NIHMS933568-supplement-supplemental.pdf]

## Supplementary Information

### The Intricate Effects of alpha-Amino and Lysine Modifications on Arginine Methylation on the N-terminal Tail of Histone H4

Melody D. Fulton<sup>‡†</sup>, Jing Zhang<sup>‡†</sup>, Maomao He<sup>†</sup>, Meng-Chiao Ho<sup>‡</sup>, Y. George Zheng<sup>†\*</sup>

*<sup>‡</sup> These authors made equal contribution to this work*

<sup>†</sup>Department of Pharmaceutical and Biomedical Sciences, College of Pharmacy, The University  
of Georgia, Athens, Georgia 30602, United States.

<sup>‡</sup>Institute of Biological Chemistry, Academia Sinica, Taipei 115, Taiwan

**\* To whom correspondence should be addressed:** Y. G. Zheng, Tel: (706) 542-0277; Fax:  
(706) 542-5358; Email: yzheng@uga.edu

**Table S1.** Calibration of histone H4(1-20) peptide concentration by  $^1\text{H}$  NMR. Adjustment factor = Mol (NMR) / Mol (weight).

| Peptide                      | Code for NMR Spectrum | Adjustment Factor |
|------------------------------|-----------------------|-------------------|
| Ac-H4(1-20)                  | WTH4                  | 0.64              |
| Ac-H4(1-20)K5 <sub>me</sub>  | H4K5me                | 0.58              |
| Ac-H4(1-20)K5 <sub>ac</sub>  | H4K5ac                | 0.65              |
| Ac-H4(1-20)K5 <sub>pr</sub>  | H4K5pr                | 0.64              |
| Ac-H4(1-20)K5 <sub>bu</sub>  | H4K5bu                | 0.65              |
| Ac-H4(1-20)K5 <sub>cr</sub>  | H4K5cr                | 0.77              |
| Ac-H4(1-20)K5 <sub>hib</sub> | H4K5hib               | 0.67              |

**Figure S1.** NMR spectra of the histone H4(1-20) peptides. A) Ac-H4(1-20), code WTH4. B) Ac-H4(1-20)K5<sub>me</sub>, code H4K5me. C) Ac-H4(1-20)K5<sub>ac</sub>, code H4K5ac. D) Ac-H4(1-20)K5<sub>pr</sub>, code H4K5pr. E) Ac-H4(1-20)K5<sub>bu</sub>, code H4K5bu. F) Ac-H4(1-20)K5<sub>cr</sub>, code H4K5cr. G) Ac-H4(1-20)K5<sub>hib</sub>, code H4K5hib.

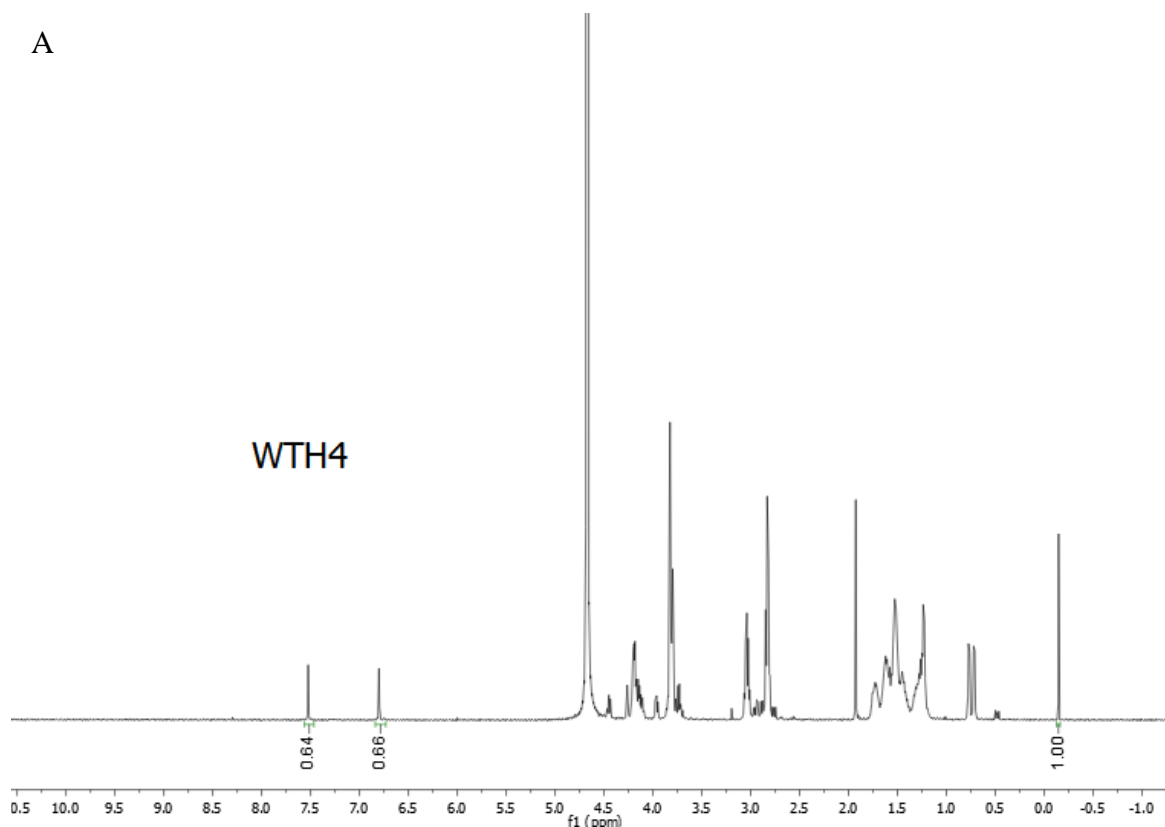

B

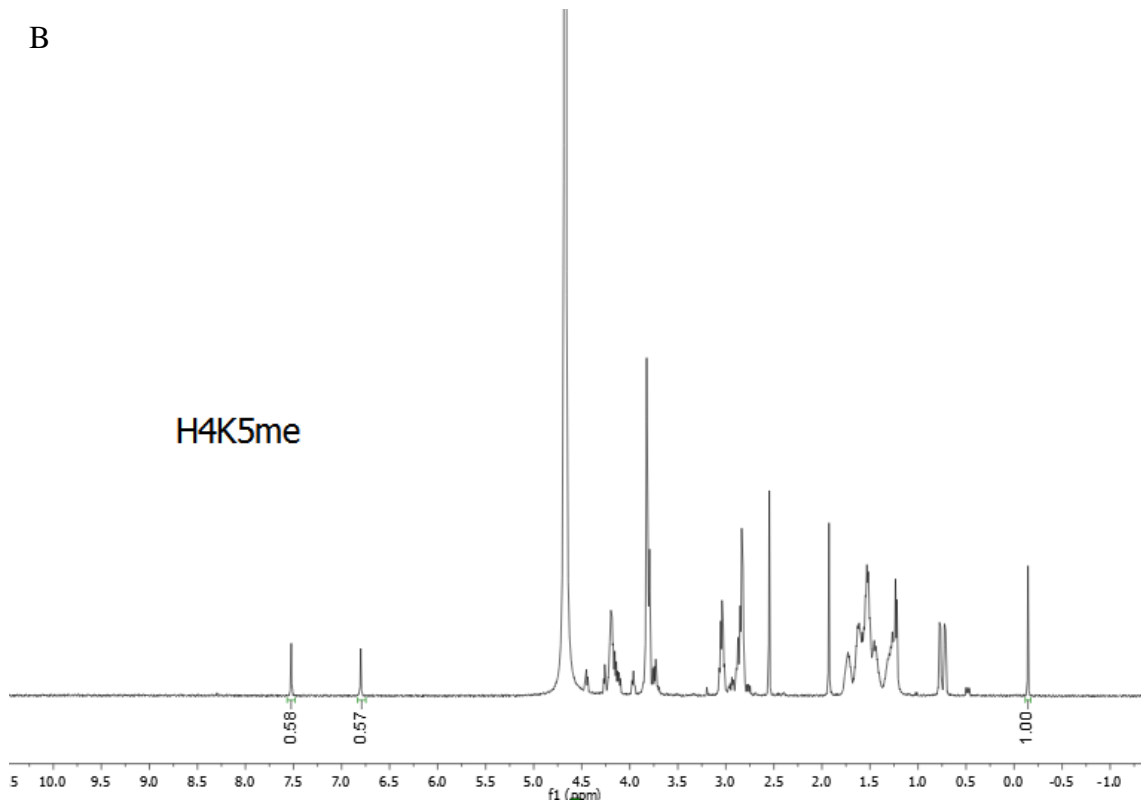

C

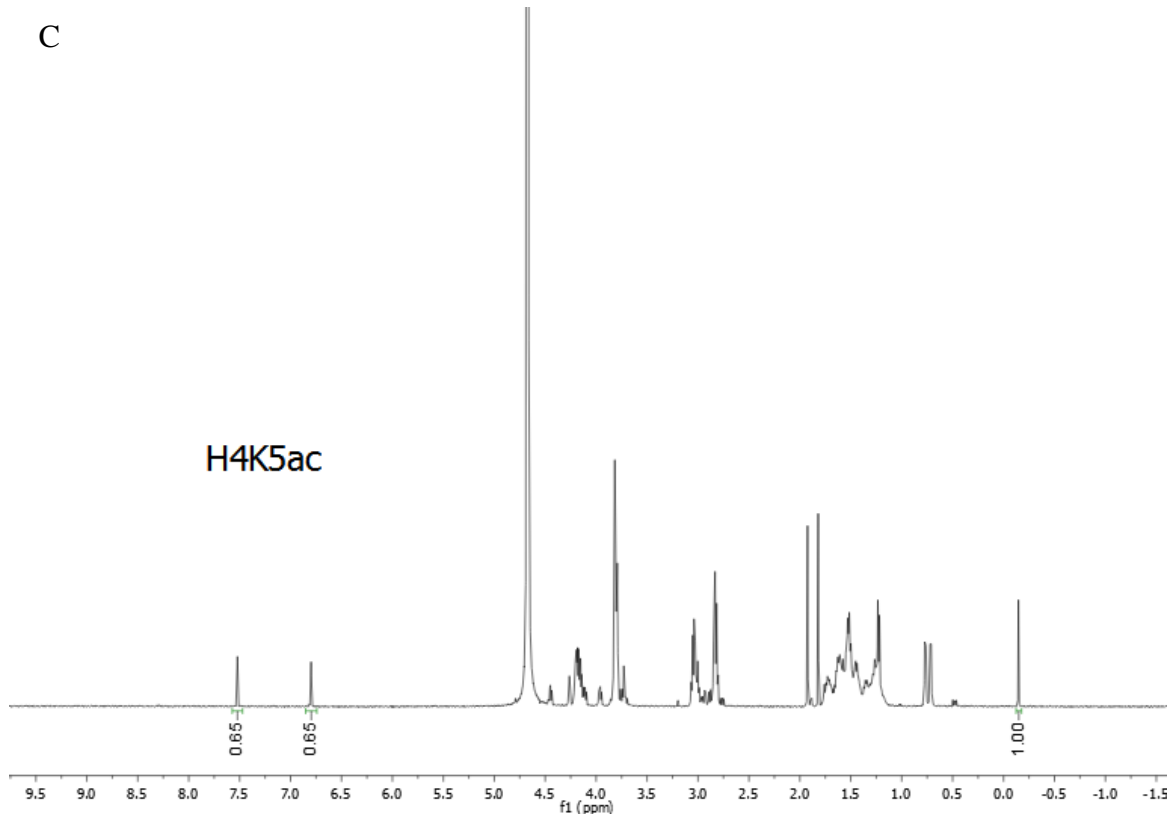

D

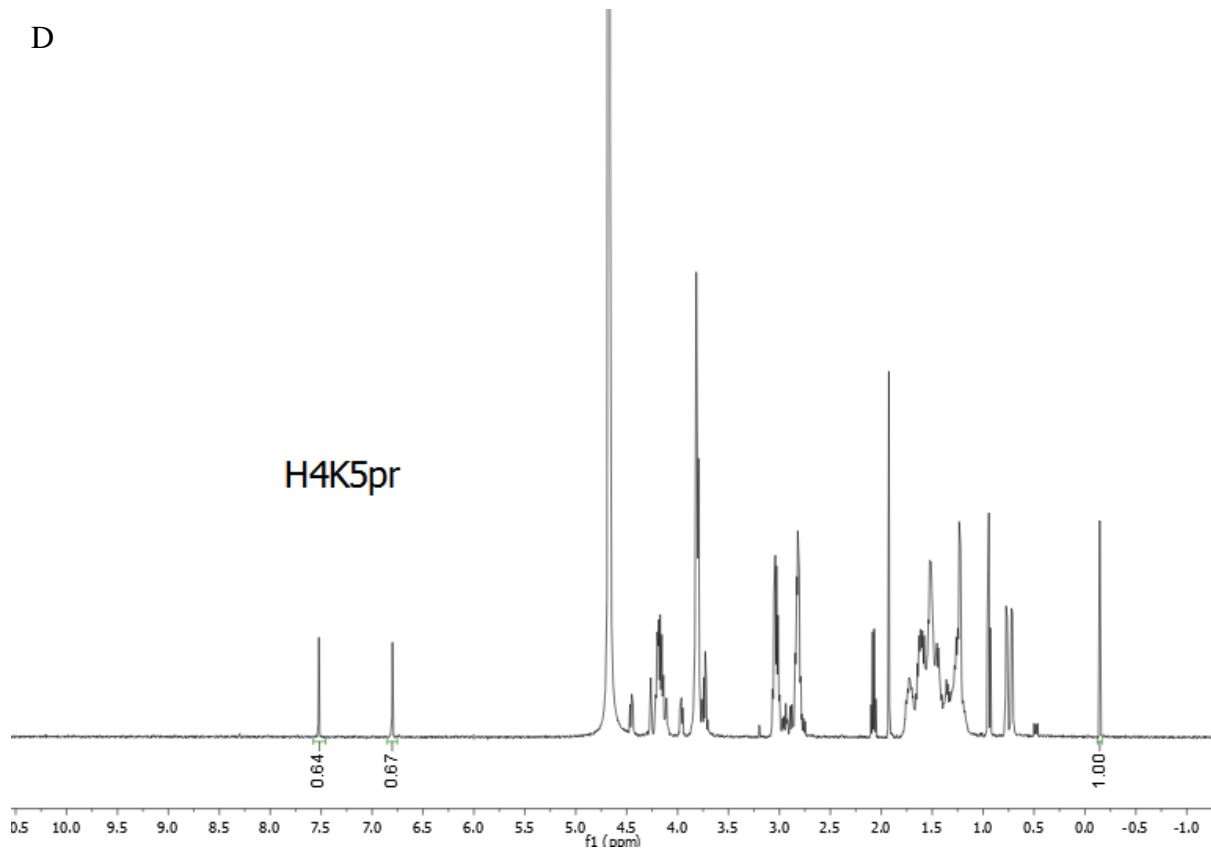

E

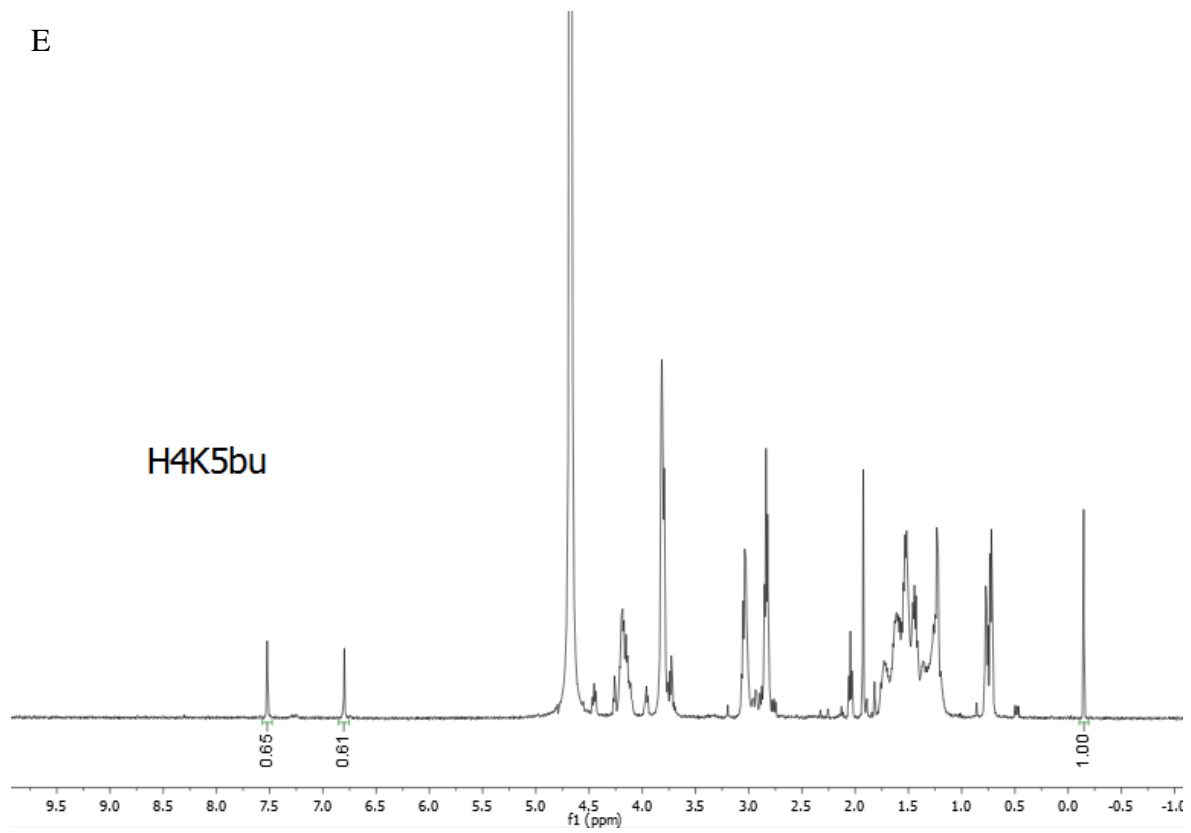

F

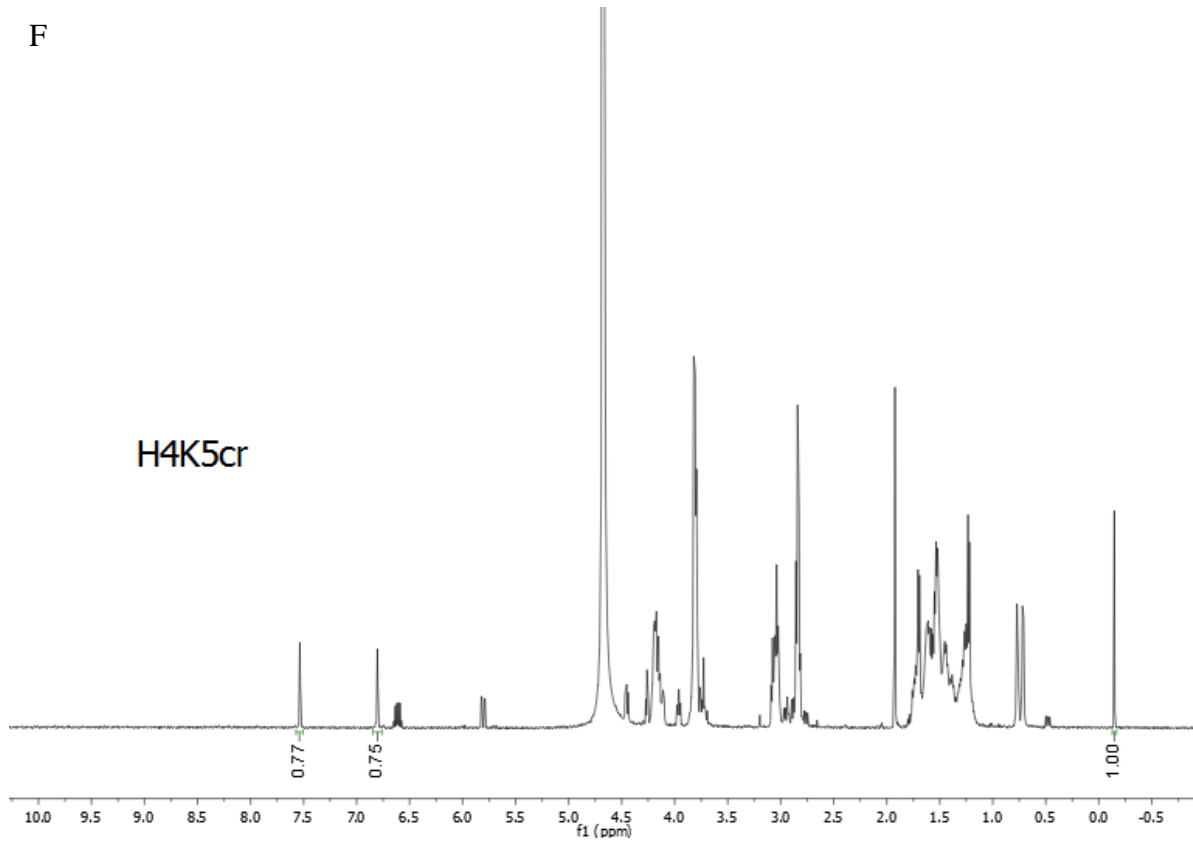

G

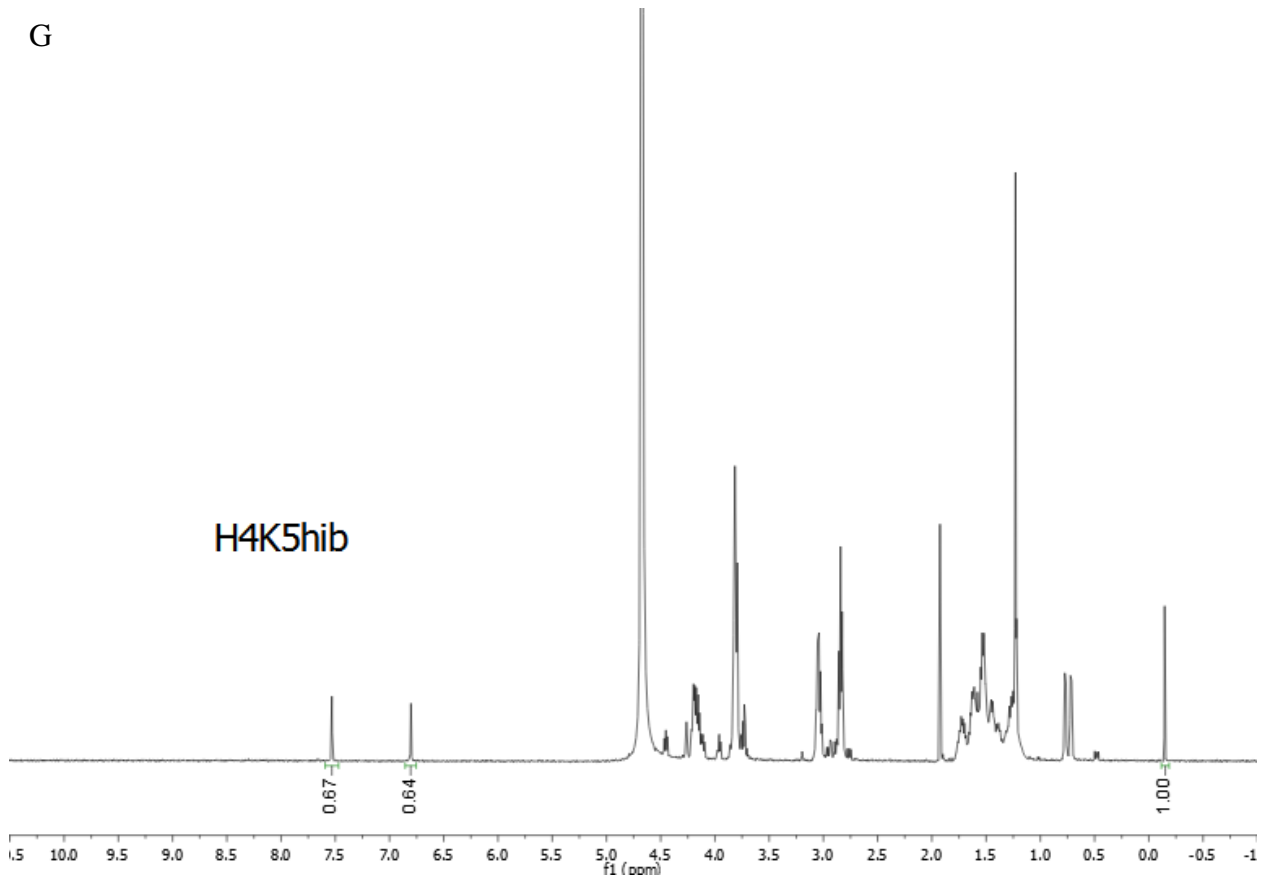

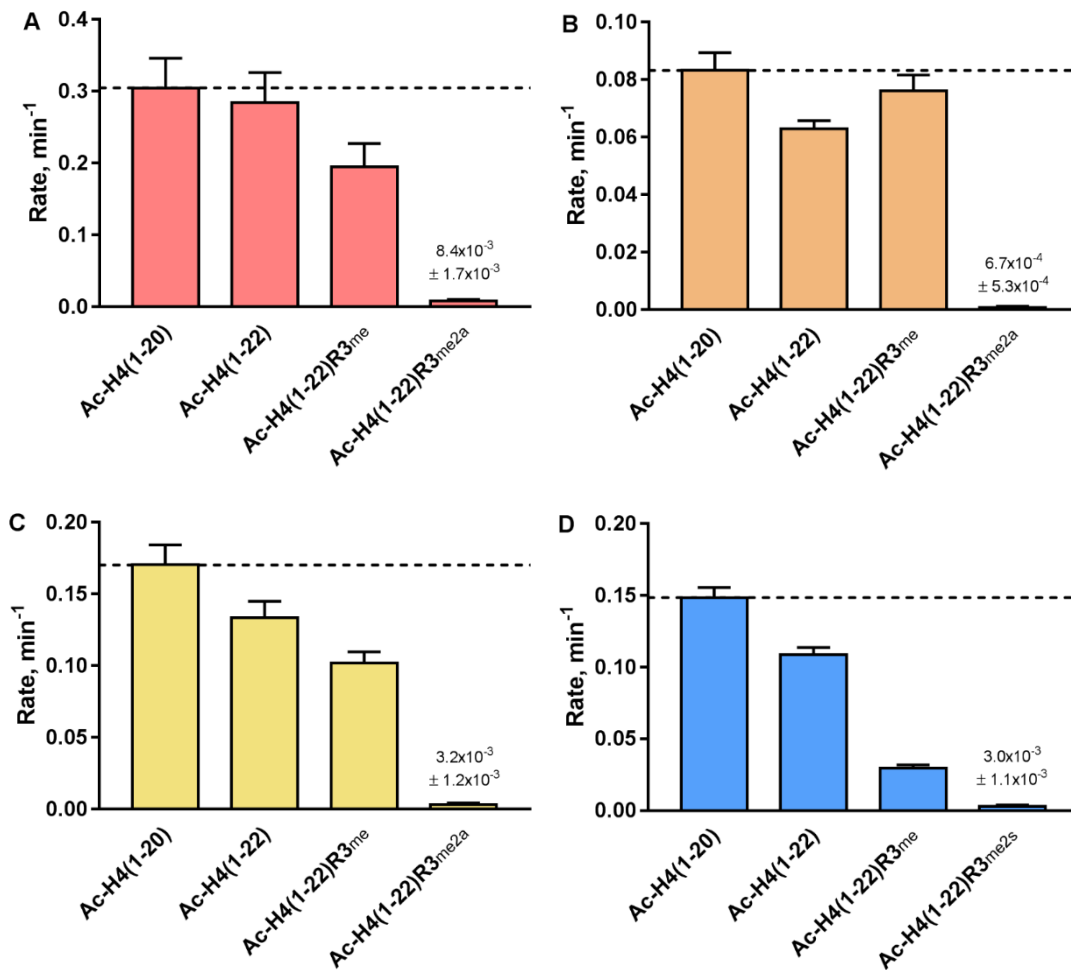

**Figure S2.** The impact of monomethylated (MMA) and dimethylated (ADMA or SDMA) H4R3 on PRMT activity. Single-point radioactive methylation assay performed with 0.05  $\mu\text{M}$  PRMT, 5  $\mu\text{M}$  [<sup>14</sup>C]SAM, and 10  $\mu\text{M}$  of peptide substrate at 30 °C over a period of 35 min. Average rates of arginine methylation by A) PRMT1, B) PRMT3, C) PRMT8, and D) PRMT5-MEP50 with peptide substrates Ac-H4(1-20), Ac-H4(1-22), Ac-H4(1-22)R3<sup>me</sup> (MMA), Ac-H4(1-22)R3<sup>me2a</sup> (ADMA), and Ac-H4(1-22)R3<sup>me2s</sup> (SDMA) are presented in each bar graph. Error bars represent standard deviation.
